# Supplementary material for: Size-dependent photoluminescence of zinc oxide quantum dots through organosilane functionalization
Source: Royal Society of Chemistry journal article supplement (doi:10.1039/c4ra10851e), 2014-01-01
Supplement: c4ra10851e1.pdf [file c4ra10851e1.pdf]

## Supplementary Information for the Manuscript

### Size-dependent photoluminescence of zinc oxide quantum dots through organosilane functionalization

*Viorica Muşat,<sup>\*,a</sup> Aurel Tăbăcaru,<sup>a</sup> Bogdan Ştefan Vasile,<sup>b</sup> Vasile-Adrian Surdu<sup>b</sup>*

\*Corresponding author

E-mail address: viorica.musat@ugal.ro; telephone: +40-757070613.

### **Synthesis of ZnO QDs grafted with MPS**

ZnO QDs were synthesized according to a slightly modified precipitation method reported in the literature.<sup>1</sup> For the sake of completeness, we give the detailed synthetic procedure, as follows: in 10 mL of methanol heated in a 100 mL round bottomed flask until 55 °C, different amounts of 3-(trimethoxysilyl)propylmethacrylate (MPS) were added in order to reach the Si/Zn molar ratio of 0, 2, 5 and 10%. After a further heating to 60 °C for 10 min, zinc acetate dihydrate was added in the reaction vessel. A basic solution of 1.25 g of potassium hydroxide, separately dissolved in 5 mL of methanol, was added dropwise. The white suspensions so obtained were stirred for 3 hours under reflux, centrifuged (9000 rpm, 5 min), washed with three portions of methanol (10 mL), and finally dried in air at 100 °C for three hours.

**Table S1.** Relevant crystallographic data for the unmodified ZnO and MPS-grafted ZnO QDs

|                                      | <b>ZnO</b>                  | <b>ZnO-MPS 2%</b>           | <b>ZnO-MPS 5%</b>           | <b>ZnO-MPS 10%</b>          |
|--------------------------------------|-----------------------------|-----------------------------|-----------------------------|-----------------------------|
| <b>Crystal System</b>                | Hexagonal                   | Hexagonal                   | Hexagonal                   | Hexagonal                   |
| <b>SPGR, Z</b>                       | <i>P6<sub>3</sub>mc</i> , 2 | <i>P6<sub>3</sub>mc</i> , 2 | <i>P6<sub>3</sub>mc</i> , 2 | <i>P6<sub>3</sub>mc</i> , 2 |
| <b>a, Å</b>                          | 3.250083447                 | 3.250510216                 | 3.24973011                  | 3.249323368                 |
| <b>b, Å</b>                          | 3.250083447                 | 3.250510216                 | 3.24973011                  | 3.249323368                 |
| <b>c, Å</b>                          | 5.206603527                 | 5.207901001                 | 5.209373951                 | 5.212234497                 |
| <b>α, °</b>                          | 90                          | 90                          | 90                          | 90                          |
| <b>β, °</b>                          | 90                          | 90                          | 90                          | 90                          |
| <b>γ, °</b>                          | 120                         | 120                         | 120                         | 120                         |
| <b>V, Å<sup>3</sup></b>              | 47.6293                     | 47.65368                    | 47.64428                    | 47.65835                    |
| <b>Mean crystallite size (nm)</b>    | 7.569                       | 5.24                        | 4.342                       | 4.189                       |
| <b>T, K</b>                          | 298                         | 298                         | 298                         | 298                         |
| <b>R<sub>p</sub>, R<sub>wp</sub></b> | 5.8606, 7.5951              | 6.7876, 8.3636              | 7.1158, 8.5534              | 7.2465, 8.8305              |
| <b>R<sub>expected</sub></b>          | 5.5439                      | 5.5114                      | 5.5391                      | 5.3924                      |
| <b>GoF</b>                           | 1.8768                      | 2.3028                      | 2.3845                      | 2.6817                      |

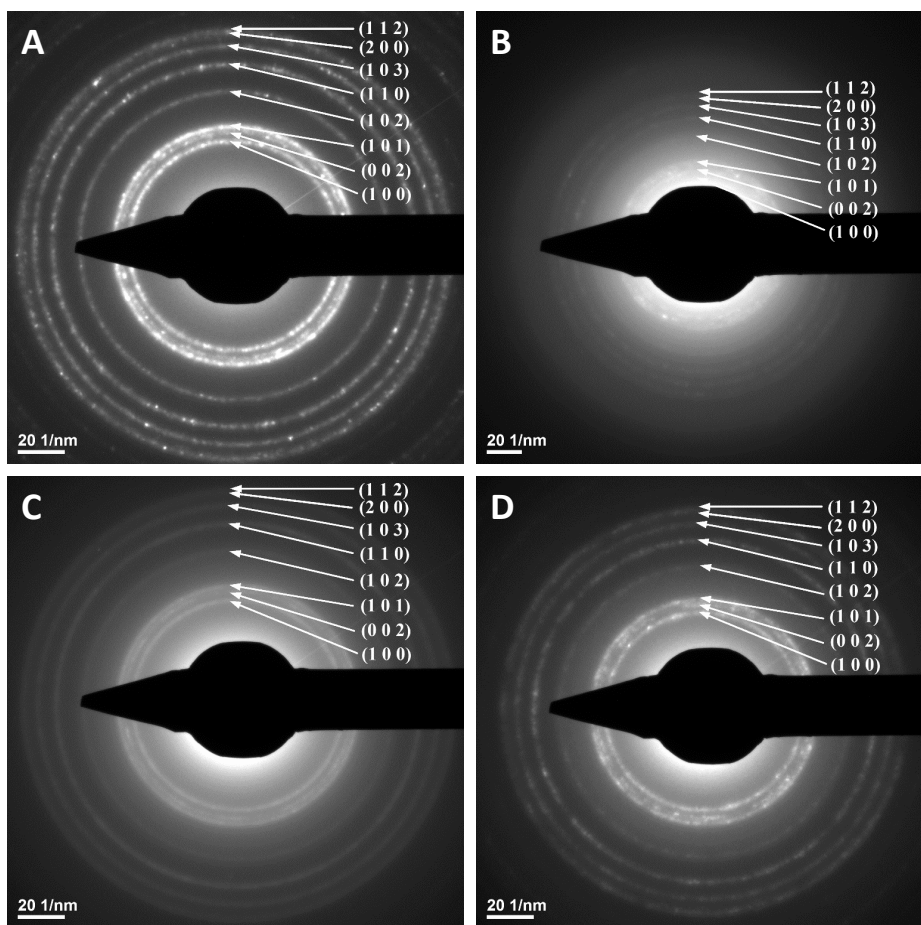

**Figure S1.** Electron diffraction patterns of unmodified ZnO (A), ZnO-MPS 2% (B), ZnO-MPS 5% (C) and ZnO-MPS 10% (D).

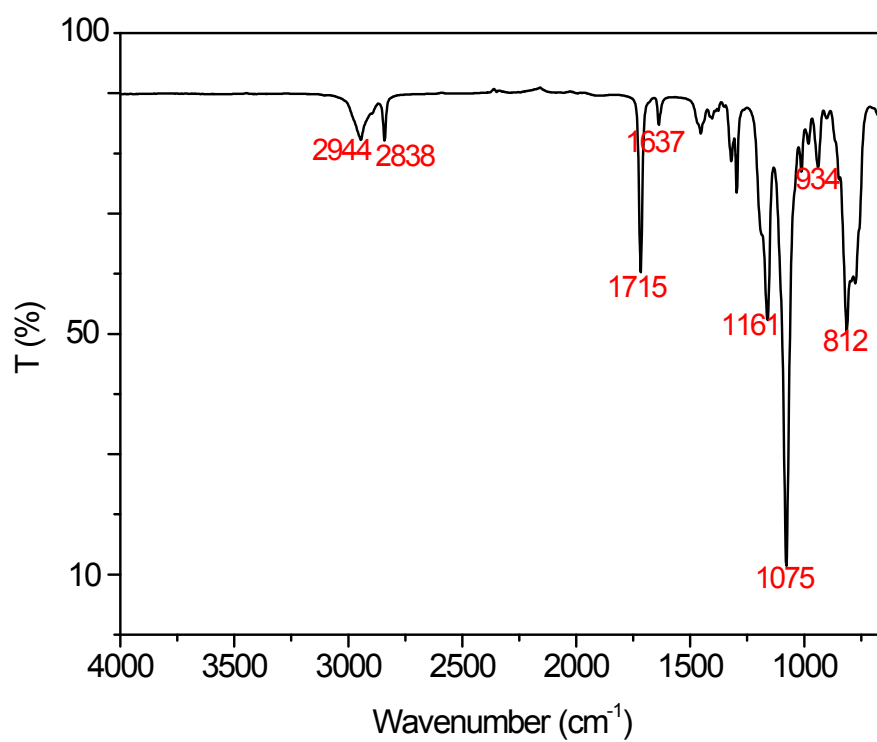

**Figure S2.** Infrared spectrum of free MPS

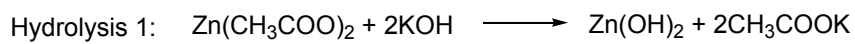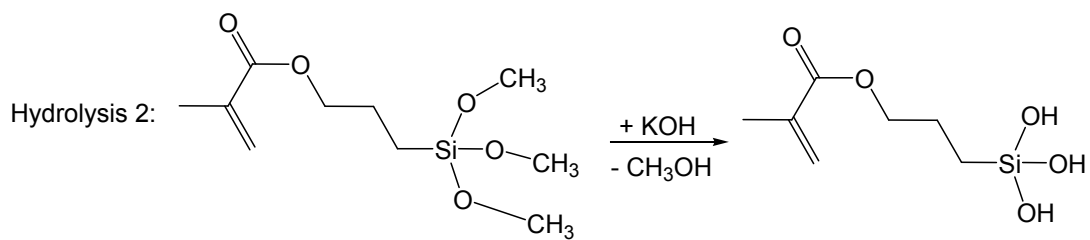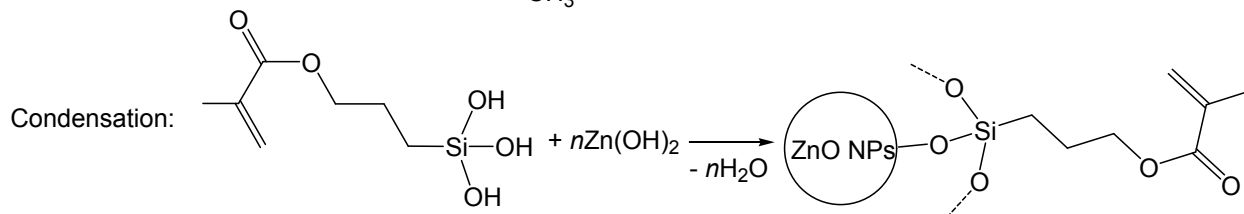

**Scheme S1.** Reaction schemes for MPS grafting of ZnO QDs

**Table S2.** Proposed stoichiometric formulae of unmodified ZnO and MPS-modified ZnO QDs

| Sample         | Proposed formula                                                                                                                          | Elem. Anal. (found) |       | Elem. Anal. (calcd.) |       |
|----------------|-------------------------------------------------------------------------------------------------------------------------------------------|---------------------|-------|----------------------|-------|
|                |                                                                                                                                           | C (%)               | H (%) | C (%)                | H (%) |
| ZnO            | $(\text{ZnO})_{25}\text{Zn}_2(\text{OH})_2(\text{CH}_3\text{COO})_2(\text{H}_2\text{O})_2$                                                | 2.089               | 0.485 | 2.041                | 0.513 |
| ZnO-MPS<br>2%  | $(\text{ZnO})_{31}\text{Zn}_2(\text{OH})_4(\text{CH}_3\text{COO})(\text{C}_7\text{H}_{11}\text{O}_5\text{Si})(\text{H}_2\text{O})_2$      | 3.567               | 0.746 | 3.579                | 0.734 |
| ZnO-MPS<br>5%  | $(\text{ZnO})_{33}\text{Zn}_3(\text{OH})_7(\text{CH}_3\text{COO})(\text{C}_7\text{H}_{11}\text{O}_5\text{Si})_2(\text{H}_2\text{O})_2$    | 5.434               | 1.037 | 5.487                | 1.036 |
| ZnO-MPS<br>10% | $(\text{ZnO})_{41}\text{Zn}_4(\text{OH})_{10}(\text{CH}_3\text{COO})(\text{C}_7\text{H}_{11}\text{O}_5\text{Si})_3(\text{H}_2\text{O})_3$ | 6.111               | 1.151 | 6.151                | 1.167 |

## REFERENCES

- 
- <sup>1</sup> M. Kotecha, W. Veeman, B. Rohe, M. Tausch, *Microporous and Mesoporous Materials* 2006, **95**, 66.
